# Supplementary material for: Long-Term Impacts of Diurnal Temperature Range on Mortality and Cardiovascular Disease: A Nationwide Prospective Cohort Study
Source: MDPI journal article supplement (doi:10.3390/metabo12121287), 2022-12-19
Supplement: s1 [file s1]

# Long-term impacts of diurnal temperature range on mortality and cardiovascular disease: A nationwide prospective cohort study

Haosu Tang<sup>1,2,3</sup>, Xin Wang<sup>4</sup>, Yuting Kang<sup>5</sup>, Congyi Zheng<sup>4</sup>, Xue Cao<sup>4</sup>, Yixin Tian<sup>4</sup>, Zhen Hu<sup>4</sup>, Linfeng Zhang<sup>4</sup>, Zuo Chen<sup>4</sup>, Yuxin Song<sup>4</sup>, Runqing Gu<sup>4</sup>, Jiayin Cai<sup>4</sup>, Gang Huang<sup>1,2,3\*</sup>, Zengwu Wang<sup>4\*</sup>, for the China hypertension survey investigators

<sup>1</sup>*State key Laboratory of Numerical Modeling for Atmospheric Sciences and Geophysical Fluid Dynamics (LASG), Institute of Atmospheric Physics, Chinese Academy of Sciences, Beijing, China*

<sup>2</sup>*Laboratory for Regional Oceanography and Numerical Modeling, Qingdao National Laboratory for Marine Science and Technology, Qingdao, China*

<sup>3</sup>*University of Chinese Academy of Sciences, Beijing, China*

<sup>4</sup>*Division of Prevention and Community Health, National Center for Cardiovascular Disease, National Clinical Research Center of Cardiovascular Disease, State Key Laboratory of Cardiovascular Disease, Fuwai Hospital, Peking Union Medical College & Chinese Academy of Medical Sciences, Beijing, China*

<sup>5</sup>*Office of the National Clinical Research Center for Geriatric Diseases, Beijing Hospital, National Center of Gerontology / Institute of Geriatric Medicine, Chinese Academy of Medical Sciences, Beijing, China*

---

## Content

- Supplemental Figures S1–S7
- Supplemental Table S1–S3
- Supplemental Text S1

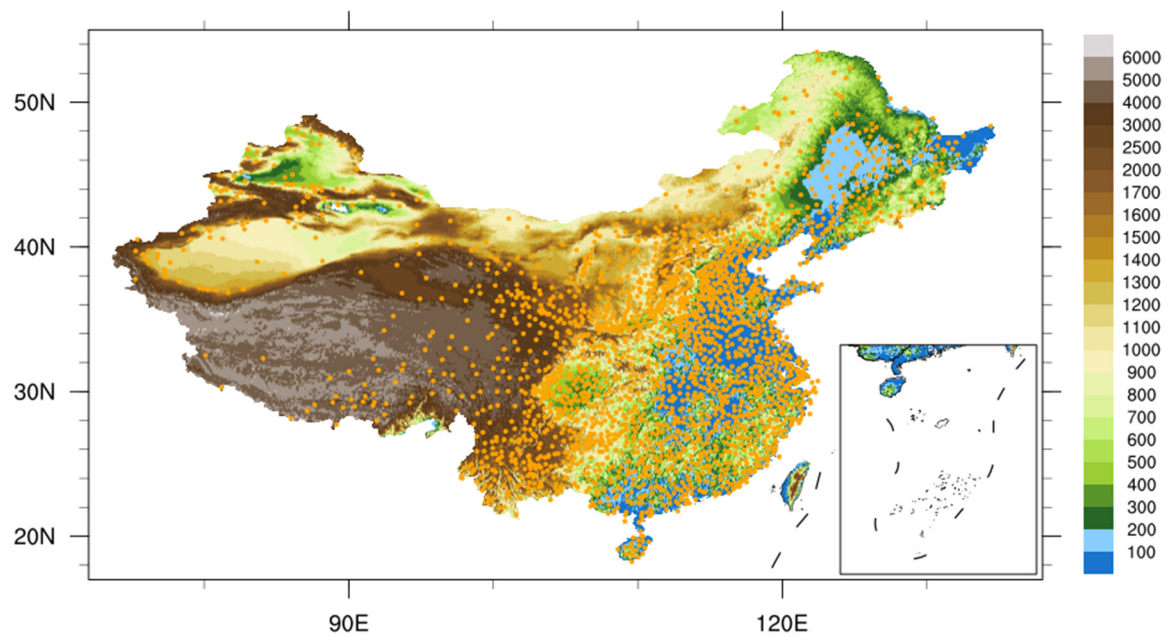

**Figure S1.** Geographical distributions of ~2419 meteorological stations in China (yellow dots), superimposed on the elevation (shading; m). Inset: South China Sea.

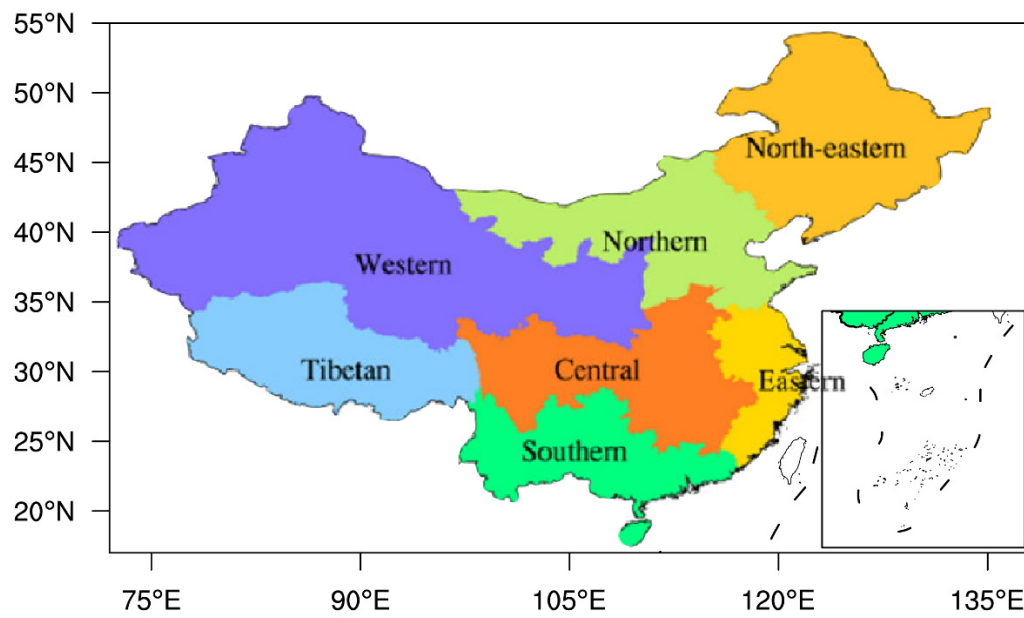

**Figure S2.** The zoning map of seven geographical areas in China.

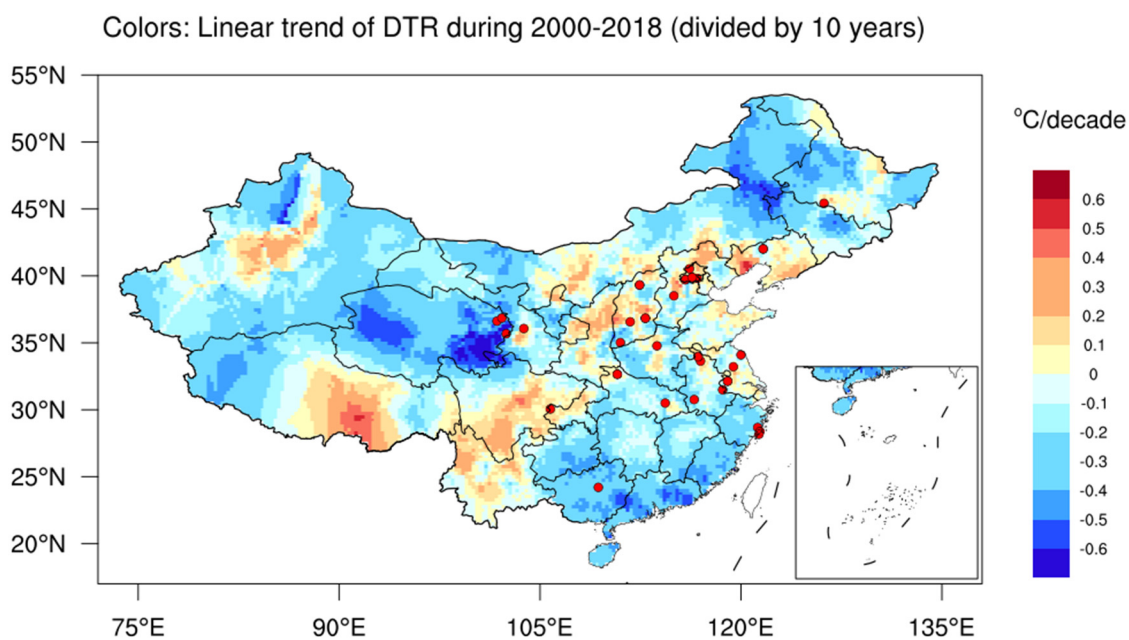

**Figure S3.** Same as Figure 2, but colors for the linear trend of DTR ( $^{\circ}\text{C}/\text{decade}$ ) from 2000–2018 (divided by 10 years) in China. Inset: South China Sea.

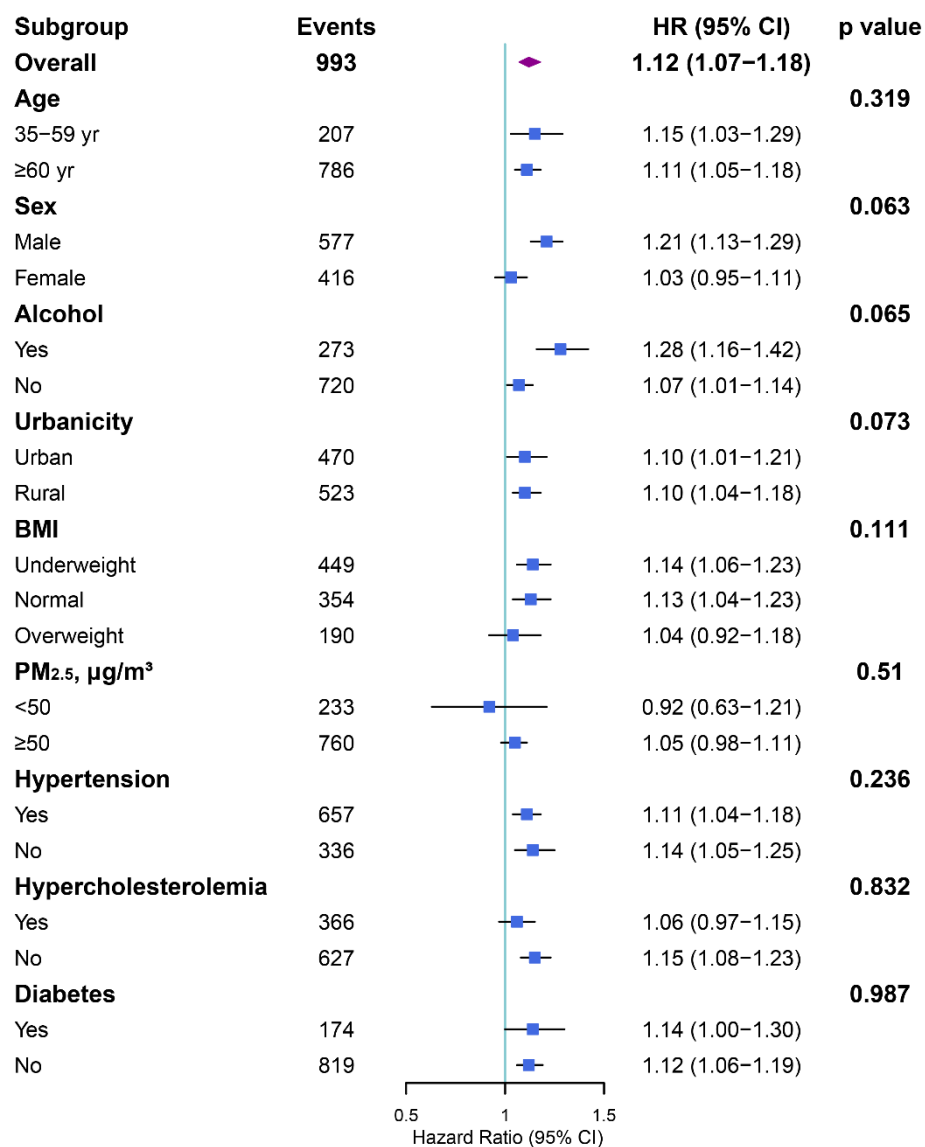

**Figure S4.** Same as Figure 4, but for CVD.

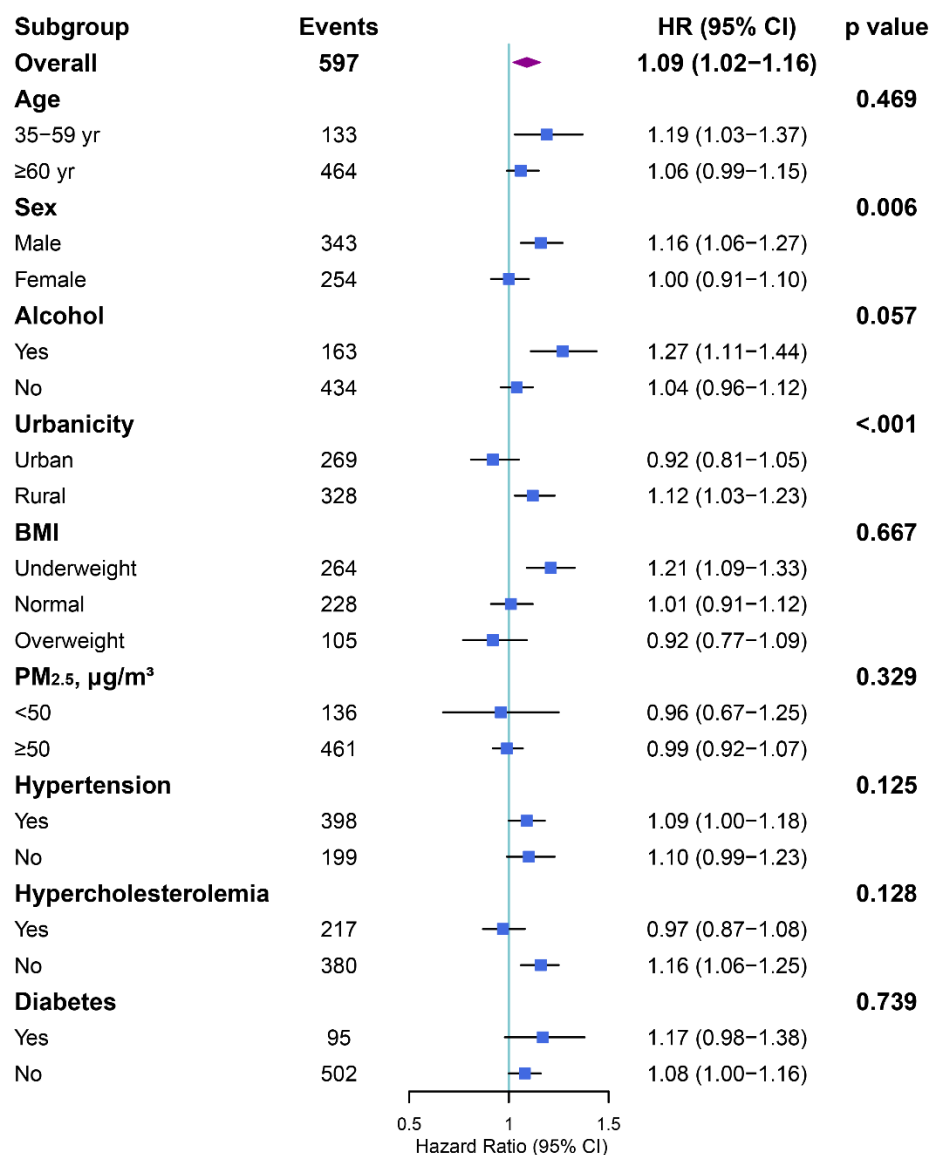

**Figure S5.** Same as Figure 4, but for stroke.

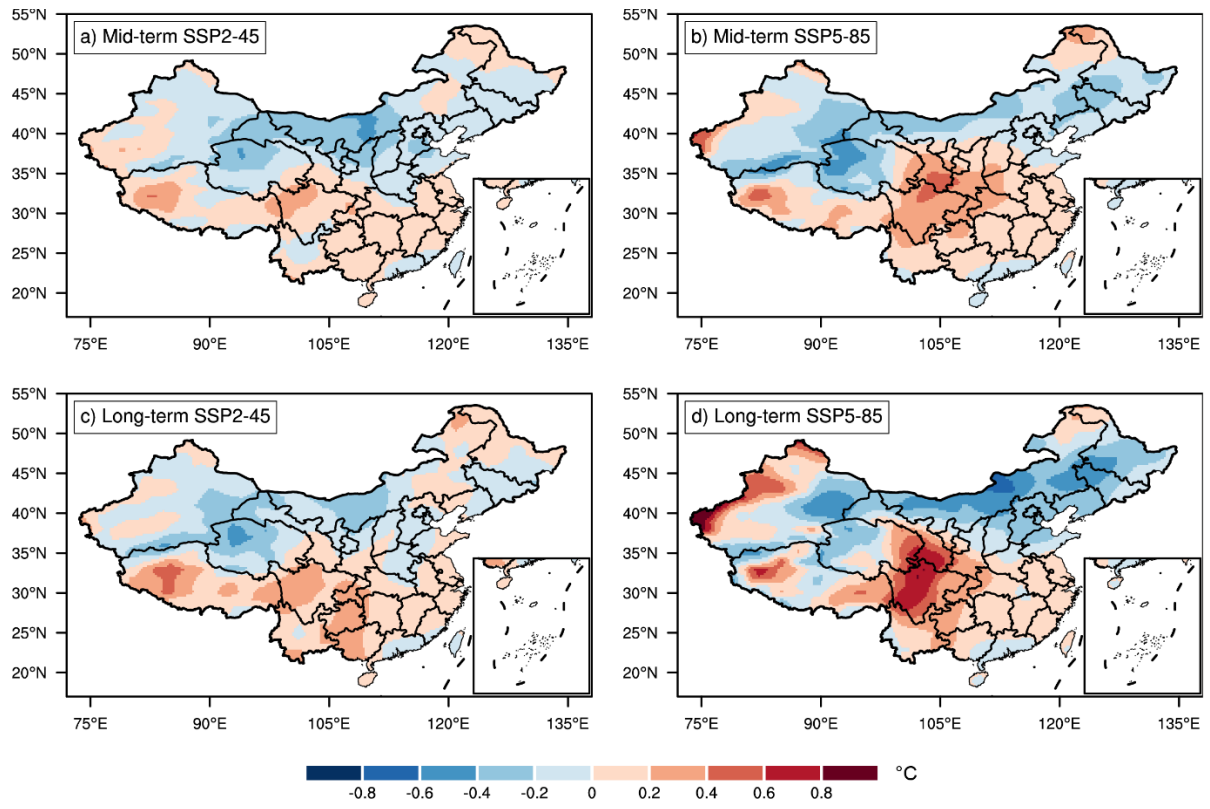

**Figure S6.** Same as Figure 5, but for warm season DTR changes.

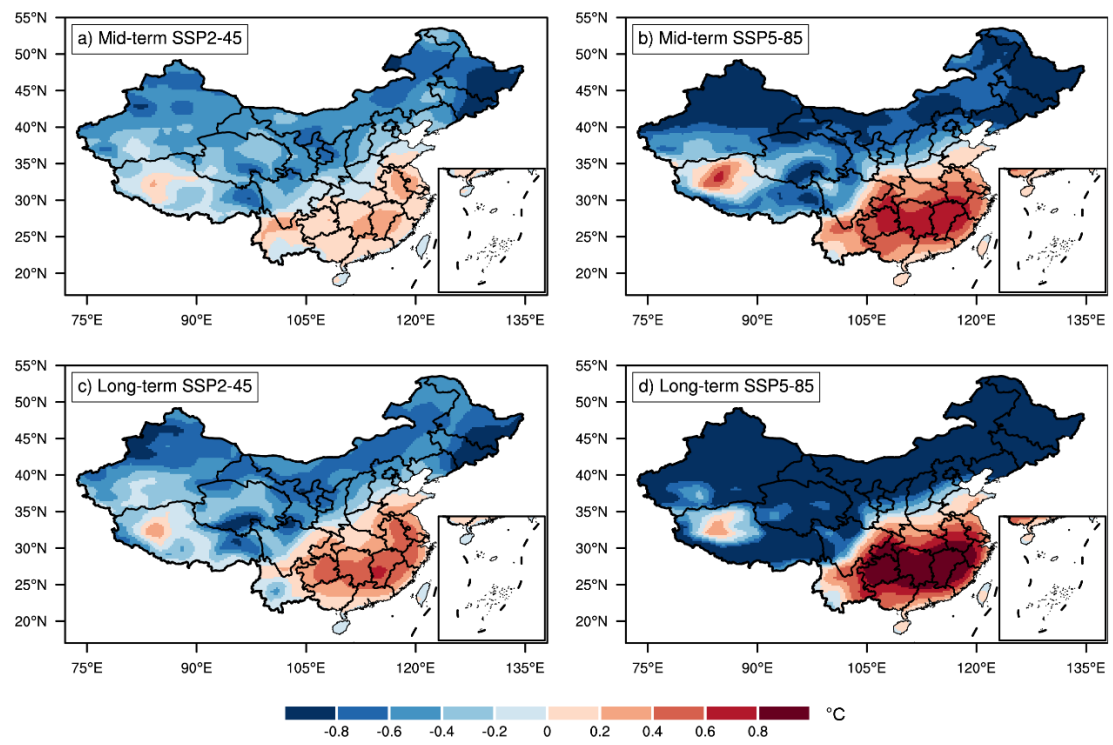

**Figure S7.** Same as Figure 5, but for cold season DTR changes.



**Table S1.** Details of 31 global climate models employed in the present study for future projection.

| Model            | Realization | Atmospheric Resolution |           | Institute/Region        |
|------------------|-------------|------------------------|-----------|-------------------------|
|                  |             | Latitude               | Longitude |                         |
| ACCESS-CM2       | rlilplfl    | 1.25°                  | 1.875°    | CSIRO–BOM/Australia     |
| ACCESS-ESM1-5    | rlilplfl    | 1.24°                  | 1.875°    |                         |
| BCC-CSM2-MR      | rlilplfl    | 1.125°                 | 1.125°    | BCC-CMA/China           |
| CMCC-CM2-SR5     | rlilplfl    | 0.94°                  | 1.25°     | CMCC/Italy              |
| CMCC-ESM2        | rlilplfl    | 0.94°                  | 1.25°     |                         |
| CNRM-CM6-1       | rlilplf2    | 1.4°                   | 1.4°      | CNRM-CERFACS/France     |
| CNRM-ESM2-1      | rlilplf2    | 1.4°                   | 1.4°      |                         |
| CanESM5          | rlilplfl    | 2.81°                  | 2.81°     | CCCma/Canada            |
| EC-Earth3        | rlilplfl    | 0.7°                   | 0.7°      | EC-Earth-Consortium     |
| EC-Earth3-Veg-LR | rlilplfl    | 1.125°                 | 1.125°    |                         |
| FGOALS-g3        | r3ilplfl    | 2.25°                  | 2°        | LASG-CES/China          |
| GFDL-CM4         | rlilplfl    | 1°                     | 1.25°     | NOAA-GFDL/United States |
| GFDL-ESM4        | rlilplfl    | 1°                     | 1.25°     |                         |
| GISS-E2-1-G      | rlilplf2    | 2°                     | 2.5°      | NASA-GISS/United States |
| HadGEM3-GC31-LL  | rlilplf3    | 1.25°                  | 1.875°    | MOHC/United Kingdom     |
| HadGEM3-GC31-MM  | rlilplf3    | 0.56°                  | 0.83°     |                         |
| INM-CM4-8        | rlilplfl    | 1.5°                   | 2°        | INM/Russia              |
| INM-CM5-0        | rlilplfl    | 1.5°                   | 2°        |                         |
| IPSL-CM6A-LR     | rlilplfl    | 1.26°                  | 2.5°      | IPSL/France             |
| KACE-1-0-G       | rlilplfl    | 1.25°                  | 1.875°    | NIMS-KMA/Korea          |
| KIOST-ESM        | rlilplfl    | 1.875°                 | 1.875°    | KIOST/South Korea       |
| MIROC-ES2L       | rlilplf2    | 2.81°                  | 2.81°     | MIROC/Japan             |
| MIROC6           | rlilplfl    | 1.4°                   | 1.4°      |                         |
| MPI-ESM1-2-HR    | rlilplfl    | 0.94°                  | 0.94°     | MPI /Germany            |
| MPI-ESM1-2-LR    | rlilplfl    | 1.875°                 | 1.875°    |                         |
| MRI-ESM2-0       | rlilplfl    | 1.125°                 | 1.125°    | MRI/Japan               |
| NESM3            | rlilplfl    | 1.875°                 | 1.875°    | NUIST/China             |

|             |          |        |        |                      |
|-------------|----------|--------|--------|----------------------|
| NorESM2-LM  | rlilplf1 | 1.875° | 2.5°   | NCC-NMI/Norway       |
| NorESM2-MM  | rlilplf1 | 0.94°  | 1.25°  |                      |
| TaiESM1     | rlilplf1 | 0.94°  | 1.25°  | RCEC-AS/China-Taiwan |
| UKESM1-0-LL | rlilplf2 | 1.25°  | 1.875° | MOHC/United Kingdom  |

**Table S2.** The climatological (2000–2018) annual mean temperature and humidity characteristics in the seven geographical areas of China.

| Areas              | DTR (°C) | maximum Ta (°C) | Minimum Ta (°C) | Relative humidity (%) |
|--------------------|----------|-----------------|-----------------|-----------------------|
| The whole China    | 11.68    | 13.66           | 1.99            | 57.77                 |
| Northeastern China | 12.23    | 9.24            | -2.99           | 62.97                 |
| Northern China     | 12.27    | 15.18           | 2.91            | 50.70                 |
| Central China      | 9.31     | 18.65           | 9.35            | 72.65                 |
| Eastern China      | 8.44     | 21.53           | 13.09           | 75.43                 |
| Southern China     | 8.87     | 22.78           | 13.91           | 76.44                 |
| Western China      | 13.18    | 11.56           | -1.62           | 49.07                 |
| Tibetan Plateau    | 13.33    | 6.54            | -6.79           | 41.58                 |

**Table S3.** Sensitivity analyses for hazard ratios (95% CIs) of all-cause mortality, CVD, and stroke associated with a 1 °C increase in annual average DTR exposure.

| Models                          | All-cause mortality | Fatal or nonfatal CVD | Fatal or nonfatal stroke |
|---------------------------------|---------------------|-----------------------|--------------------------|
| raw                             | 1.13 (1.08–1.18)    | 1.12 (1.07–1.18)      | 1.09 (1.02–1.16)         |
| 1) January                      | 1.09 (1.06–1.13)    | 1.13 (1.08–1.18)      | 1.15 (1.09–1.21)         |
| 2) February                     | 1.06 (1.03–1.09)    | 1.07 (1.04–1.11)      | 1.04 (1.00–1.09)         |
| 3) March                        | 1.08 (1.04–1.12)    | 1.08 (1.03–1.12)      | 1.05 (1.00–1.11)         |
| 4) April                        | 1.06 (1.03–1.10)    | 1.06 (1.02–1.10)      | 1.04 (0.99–1.09)         |
| 5) May                          | 1.14 (1.10–1.18)    | 1.12 (1.08–1.17)      | 1.10 (1.05–1.16)         |
| 6) June                         | 1.11 (1.06–1.16)    | 1.11 (1.06–1.17)      | 1.06 (1.00–1.13)         |
| 7) July                         | 1.11 (1.05–1.17)    | 1.11 (1.04–1.18)      | 1.10 (1.01–1.19)         |
| 8) August                       | 1.06 (1.02–1.11)    | 1.04 (0.99–1.09)      | 0.97 (0.91–1.03)         |
| 9) September                    | 1.09 (1.05–1.13)    | 1.07 (1.03–1.12)      | 1.04 (0.98–1.09)         |
| 10) October                     | 1.14 (1.09–1.19)    | 1.14 (1.08–1.19)      | 1.11 (1.04–1.18)         |
| 11) November                    | 1.11 (1.06–1.15)    | 1.06 (1.01–1.11)      | 1.05 (0.99–1.12)         |
| 12) December                    | 1.16 (1.11–1.22)    | 1.12 (1.06–1.18)      | 1.13 (1.05–1.22)         |
| 13) Warm season                 | 1.11 (1.06–1.17)    | 1.10 (1.04–1.16)      | 1.04 (0.97–1.12)         |
| 14) Cold season                 | 1.12 (1.08–1.16)    | 1.11 (1.06–1.15)      | 1.09 (1.03–1.15)         |
| 15) Transitional season         | 1.13 (1.08–1.18)    | 1.12 (1.06–1.17)      | 1.09 (1.03–1.16)         |
| 16) Excluding subjects          | 1.13 (1.08–1.19)    | 1.12 (1.06–1.18)      | 1.08 (1.01–1.16)         |
| 17) DTR mean during follow-up   | 1.14 (1.09–1.19)    | 1.13 (1.08–1.19)      | 1.10 (1.03–1.17)         |
| 18) Residential mobility        | 1.11 (1.04–1.18)    | 1.10 (1.04–1.17)      | 1.08 (1.01–1.15)         |
| 19) Model 4 + NDVI              | 1.14 (1.08–1.20)    | 1.15 (1.09–1.22)      | 1.09 (1.01–1.18)         |
| 20) Model 4 + relative humidity | 1.17 (1.11–1.24)    | 1.16 (1.09–1.23)      | 1.12 (1.03–1.22)         |

Abbreviations: CVD, cardiovascular disease; DTR, diurnal temperature range; NDVI, normalized difference vegetation index.

**Text S1.** List of the China Hypertension Survey Investigators.

This study could not be accomplished without the fine work of the staff at the national level. For a partial listing of colleagues see the follows (provinces sorted as alphabetical order):

**Anhui:** Liquan Hu, Hongqi Li, Qi Zhang, Guang Yan, Anhui Provincial Hospital, Hefei, Anhui, China; Fangfang Zhu, Anhui Institute of Cardiovascular Disease, Hefei, Anhui, China.

**Beijing:** Xianghua Fang, Chunxiu Wang, Shaochen Guan, Xiaoguang Wu, Hongjun Liu, Chengbei Hou, Xuanwu Hospital, Capital Medical University, Beijing, China.

**Chongqing:** Han Lei, Wei Huang, Nan Zhang, First Affiliated Hospital of Chongqing Medical University, Chongqing, China; Ge Li, Lihong Mu, Xiaojun Tang, Chongqing Medical University, Chongqing, China.

**Fujian:** Ying Han, Huajun Wang, Dongjie Lin Liangdi Xie, First Affiliated Hospital of Fujian Medical University, Fuzhou, Fujian, China; Daixi Lin, Fujian medical university, Fuzhou, Fujian, China.

**Gansu:** Jing Yu, Xiaowei Zhang, Wei Liang, Heng Yu, Qiongying Wang, Lanzhou University Second Hospital, Lanzhou, Gansu, China; Lan Yang, Maternal and Child Care Service Centre, Lanzhou, Gansu, China.

**Guangdong:** Yingqing Feng, Yuqing Huang, Guangdong General Hospital, Guangzhou, Guangdong, China; Peixi Wang, Jiaji Wang, Guangzhou Medical University, Guangzhou, Guangdong, China; Harry HX Wang, Sun Yat-Sen University, Guangzhou, Guangdong, China; Songtao Tang, Community Health Services Center of Liaobu, Dongguan, Guangdong, China.

**Guangxi:** Tangwei Liu, Rongjie Huang, Zhiyuan Jiang, Haichan Qin, First Affiliated Hospital of Guangxi Medical University, Nanning, Guangxi, China.

**Guizhou:** Guoqin Liu, Zhijun Liu, Wenbo Rao, Zhen Chen, Yalin Chu, Fang Wu, Zunyi Medical University, Zunyi, Gouzhou, China.

**Hainan:** Haitao Li, Jianlin Ma, Tao Chen, Hainan General Hospital, Haikou, Hainan, China; Ming Wu, Health and Family Planning Commission of Hainan, Haikou, Hainan, China.

**Hebei:** Jixin Sun, Yajing Cao, Yuhuan Liu, Center for Disease Prevention and Control of Hebei, Shijiazhuang, Hebei, China; Zhikun Zhang, Center for Disease Prevention and Control of Tangshan, Tangshan, Hebei, China; Yanmei Liu, Center for Disease Prevention and Control of Langfang, Langfang, Hebei, China;

Dejin Dong, Center for Disease Prevention and Control of Xingtai, Xingtai, Hebei, China; Guangrong Li, Center for Disease Prevention and Control of Dingzhou, Dingzhou, Hebei, China.

**Heilongjiang:** Hong Guo, Lihang Dong, Haiyu Zhang, Fengyu Sun, Xingbo Gu, Ye Tian, First Affiliated Hospital of Harbin Medical University, Haerbin, Heilongjiang, China.

**Henan:** Kaijuan Wang, Chunhua Song, Peng Wang, Hua Ye, Zhengzhou University, Zhengzhou, Henan, China; Wei Nie, Shuying Liang, Henan Academy of Medical Sciences, Zhengzhou, Henan, China.

**Hubei:** Congxin Huang, Fang Chen, Yan Zhang, Heng Zhou, Jing Xie, Jianfang Liu, Department of Cardiology, Renmin Hospital of Wuhan University, Wuhan, Hubei, China.

**Hunan:** Hong Yuan, Chengxian Guo, Third Xiangya Hospital, Central South University, Changsha, Hunan, China; Yuelong Huang, Biyun Chen, Center for Disease Control and Prevention of Hunan, Changsha, Hunan, China.

**Inner Mongolia:** Xingsheng Zhao, Wenshuai He, Xia Wen, Yanan Lu, Inner Mongolia people's hospital, Hohhot, Inner Mongolia, China.

**Jiangsu:** Xiangqing Kong, Ming Gui, Wenhua Xu, Yan Lu, Jun Huang, First Affiliated Hospital of Nanjing Medical University, Nanjing, Jiangsu, China; Min Pan, Affiliated Hospital of Nantong University, Nanjing, Jiangsu, China; Jinyi Zhou, Ming Wu, Center for Disease Control and Prevention of Jiangsu, Nanjing, Jiangsu, China.

**Jiangxi:** Xiaoshu Cheng, Huihui Bao, Xiao Huang, Kui Hong, Juxiang Li, Ping Li, Second Affiliated Hospital of Nanchang University, Nanchang, Jiangxi, China.

**Jilin:** Bin Liu, Junduo Wu, Longbo Li, Yunpeng Yu, Yihang Liu, Chao Qi, Second Hospital of Jilin University, Changchun, Jilin, China.

**Liaoning:** Jun Na, Li Liu, Yanxia Li, Guowei Pan, Center for Disease Prevention and Control of Liaoning, Shenyang, Liaoning, China; Degang Dong, Peng Qu, Health and Family Planning Commission of Liaoning, Shenyang, Liaoning, China.

**Ningxia:** Jinbao Ma, Health and Family Planning Commission of Ning Xia Hui Autonomous Region, Yinchuan, Ningxia, China; Juan Hui, Center for Disease Control and Prevention of Ning Xia Hui Autonomous

Region, Yinchuan, Ningxia, China; Fu Zhao, Health Supervision Institute of Xixia District in Yinchuan, Ning Xia Hui Autonomous Region, Yinchuan, Ningxia, China.

**Qing Hai:** Jianning Yue, Minru Zhou, Zhihua Xu, Xiaoping Li, Qiongyue Sha, Fuchang Ma, Qing Hai Center for Disease Control and Prevention, Xining, Qinghai, China; Qihong Chen, Huiping Bian, Qinghai Cardio-Cerebrovascular Disease Special Hospital, Xining, Qinghai, China.

**Shaanxi:** Jianjun Mu, Tongshuai Guo, Keyu Ren, Chao Chu, First Affiliated Hospital of Xi'an Jiaotong University, Xian, Shaanxi, China.

**Shandong:** Zhendong Liu, Hua Zhang, Yutao Diao, Shangwen Sun, Yingxin Zhao, Institute of Basic Medicine, Shandong Academy of Medical Sciences, Jinan, Shandong, China.

**Shanghai:** Junbo Ge, Jingmin Zhou, Xuejuan Jin, Jun Zhou, Zhongshan Hospital, Fudan University, Shanghai, China.

**Shanxi:** Bao Li, Lijun Zhu, Yuean Zhang, Gang Wang, Shanxi Cardiovascular Hospital, Taiyuan, Shanxi, China; Zhihan Hao, Wuxiang County People's Hospital, Wuxiang, Shanxi, China.

**Sichuan:** Li Cai, Zhou Liu, Zhengping Yong, Jianhong Tao, Yijia Tang, Sichuan Provincial People's Hospital, Chengdu, Sichuan, China; Shaoping Wan, Sichuan Cancer Hospital, Chengdu, Sichuan, China.

**Tianjin:** Zhenshan Jiao, Yuqiang Fan, Tianjin Academy of Traditional Chinese Medicine, Tianjin, China; Hui Gao, Wei Wang, Tianjin Municipal Commission of Health and Family Planning, Tianjin, China; Qingkui Li, Xiaomei Zhou, Tianjin Medical University, Tianjin, China.

**Tibet:** Yundai Chen, Bin Feng, Qinglei Zhu, Sansan Zhou, Chinese People's Liberation Army General Hospital, Lasha, Tibet, China.

**Xinjiang:** Nanfang Li, Lin Zhou, Delian Zhang, Jing Hong, People's Hospital of Xinjiang Uygur Autonomous Region, Urumuqi, Xinjiang, China.

**Yunnan:** Tao Guo, Min Zhang, First Affiliated Hospital of Kunming Medical University, Kunming, Yunnan, China; Yize Xiao, Center for Disease Prevention and Control of Yunnan, Kunming, Yunnan, China; Xuefeng Guang, Affiliated Yan'an Hospital of Kunming Medical University, Kunming, Yunnan, China.

**Zhejiang:** Xinhua Tang, Jing Yan, Xiaoling Xu, Li Yang, Aimin Jiang, Wei Yu, Zhejiang Hospital,

Hangzhou, Zhejiang, China.
